# Supplementary material for: Uniform poly(phosphazene–triazine) porous microspheres for highly efficient iodine removal
Source: Royal Society of Chemistry journal article supplement (doi:10.1039/c8cc04242j), 2018-01-01
Supplement: c8cc04242j1.pdf [file c8cc04242j1.pdf]

## Electronic Supplementary Information for

### Uniform poly(phosphazene-triazine) porous microspheres for highly efficient iodine removal

Shaohui Xiong,<sup>a</sup> Jian Tao,<sup>a</sup> Yuanyuan Wang,<sup>a</sup> Juntao Tang,<sup>a</sup> Cheng Liu,<sup>b</sup> Qingquan Liu,<sup>c</sup> Yan Wang,<sup>a</sup> Guipeng Yu,<sup>\*, a, b</sup> and Chunyue Pan<sup>\*, a</sup>

<sup>a</sup> College of Chemistry and Chemical Engineering, Hunan Provincial Key Laboratory of Efficient and Clean Utilization of Manganese Resources, Central South University, Changsha 410083, China. E-mail: gilbertyu@csu.edu.cn, panchunyue@csu.edu.cn

<sup>b</sup>State Key Laboratory of Fine Chemicals, Dalian University of Technology, Dalian 116012, China.

<sup>c</sup>Institute of Materials Science and Engineering, Hunan University of Science and Technology, Xiangtan 411201, China

### Table of Contents

| Section   |                                                                                              | Page NO |
|-----------|----------------------------------------------------------------------------------------------|---------|
| Section 1 | Materials and Measurements                                                                   | S2-S3   |
| Section 2 | Synthesis and Characterization of TAPT, MelPOP-2 and TatPOP-2                                | S3-S4   |
| Fig. S1   | TGA curves of MelPOP-2 and TatPOP-2                                                          | S4      |
| Fig. S2   | XPS of P spectra for POPNs                                                                   | S5      |
| Fig. S3   | EDS spectra of polymers                                                                      | S5      |
| Fig. S4   | The TEM images of MelPOP-2 and TatPOP-2.                                                     | S5      |
| Fig. S5   | X-ray powder diffraction patterns of POPNs                                                   | S6      |
| Fig. S6   | Solid UV-vis and luminescent spectra of POPNs                                                | S6      |
| Table S1  | Pore parameters for polymers                                                                 | S6      |
| Fig. S7   | BET surface area linear plot for POPNs                                                       | S7      |
| Table S2  | Detailed iodine uptake properties comparisons in porous materials                            | S7      |
|           | References for Table S2                                                                      | S7- S8  |
| Table S3  | Element analysis for POPNs                                                                   | S8      |
| Fig. S8   | XPS spectra of TatPOP-2@I <sub>2</sub> and MelPOP-2@I <sub>2</sub>                           | S9      |
| Fig. S9   | UV-vis spectra for MelPOP-2 in iodine-hexane solution                                        | S9      |
| Fig. S10  | Photographs of iodine capture in solution phase.                                             | S9      |
| Fig. S11  | UV-vis spectra of iodine released from TatPOP-2@I <sub>2</sub> and MelPOP-2@I <sub>2</sub> . | S10     |
| Fig. S12  | Working curve for the estimation of iodine uptake in solution                                | S10     |
| Fig. S13  | The release rate of TatPOP-2@I <sub>2</sub> and MelPOP-2@I <sub>2</sub> .                    | S10     |

## **Section 1. Materials and Measurements**

### **Materials**

All chemical reagents and solvents were of analytical-grade and used as obtained without further purification unless stated otherwise. Hexachlorocyclotriphosphazene (HCCP), melamine, 4-aminobenzonitrile, trifluoromethanesulfonic acid and triethylamine (TEA) was produced by Energy Chemical Co., Ltd. Super dry dimethyl sulfoxide (DMSO, 99.7%) were purchased from J&K scientific Co., Ltd.

### **Measurements**

#### **Fourier transform infrared (FT-IR) spectra**

Fourier transform infrared (FT-IR) spectra were operated on a Thermo Nicolet Nexus 380 FT-IR instrument employing KBr pellets.

#### **Magic-angle spinning solid-state $^{13}\text{C}$ NMR spectra**

Magic-angle spinning solid-state  $^{13}\text{C}$ NMR spectra were recorded on a Bruker Avance III 400 NMR spectrometer. The spectra were measured using a contact time of 2.0 ms and a relaxation delay of 10.0 s.

#### **Thermogravimetric analysis (TGA)**

Thermogravimetric analyses (TGA) were performed on a Mettler TGA/SDTA851 thermogravimetric analysis instrument under nitrogen flow with a heating rate of 10 °C/min ranging from 0 to 750 °C.

#### **UV-vis absorption spectra (UV-vis)**

UV-vis absorption spectra were measured using a Hitachi U-5100 spectrophotometer.

#### **Fluorescence spectroscopy**

The solid-state fluorescence spectroscopies were recorded with a front surface accessory on a FLS920 fluorescence spectrometer.

#### **Scanning electron microscopy (SEM)**

Scanning electron microscopy was performed on a FEI SIRION200 microscope under scanning voltages of 10 kV. Before testing, gold granules were labeled with the samples.

#### **Transmission electron microscopy (TEM) and Energy dispersive X-ray spectrometry (EDS)**

High resolution TEM and EDS were carried out on a JEOL JEM-2100F microscope operating at an accelerating voltage of 200 kV and attached with a EDS spectrometer. Before measurement, the samples were dispersed in anhydrous ethanol in ultrasonical bath and dropped on a honey carbon film coated with a copper grid.

#### **Powder X-ray diffraction (PXRD)**

Wide-angle PXRD data were recorded using INEL CPS 120 powder diffractometer equipped with Ni-filtered Cu K $\alpha$  radiation (40 kV, 100 mA) with  $2\theta$  ranging from 5° to 60°.

#### **Nitrogen adsorption-desorption isotherm measurement**

The dry state polymer surface areas and pore characteristics were conducted on a Micromeritics ASAP 2020 adsorption analyzer by nitrogen sorption at 77 K. Prior to each measurement, the samples were activated at 100 °C for 10 h under vacuum. About 100 mg of polymer was employed for each gas sorption measurement. The specific surface areas (SBET) were calculated using Brunauer-Emmett-Teller (BET)

model. The pore size distributions were derived from adsorption isotherms based on non-local density functional theory (NLDFT).

#### **Element analysis (EA)**

C, H, N content of the samples were determined by using a Vario ELIII CHNOS elemental analyzer.

#### **Detailed operating steps for the capture of iodine vapor**

The iodine vapor capture experiment was carried out according the following procedure. Two small weighing bottles were separately charged with activated MelPOP-2 (16.00 mg) and TatPOP-2 (16.00 mg). Then the bottles were placed in a sealed glass container equipped with excess iodine pellets at the bottom. The container was vacuumized and heated at 75 °C under ambient pressure. Thereafter, the samples were cooled down to room temperature and weighed at different time intervals. The iodine uptakes of samples were calculated by weight gain according to:  $\alpha = [(m_2 - m_1)/m_1] \times 100 \text{ wt } \%$ , where  $\alpha$  is the iodine uptake,  $m_1$  and  $m_2$  are the mass of POPNs before and after adsorption of iodine. The iodine capture experiments were repeated three times to ensure the data was authentic and dependable.

#### **Detailed operating steps for the capture of iodine in organic solution**

The iodine capture experiment in organic solution was carried out according the following procedure. To study the iodine uptake capacity of POPNs in organic solution, the activated samples with the same weight (16.00 mg) were immersed into iodine/n-hexane (8.00 mmol/L). Then the supernatant (2.00 mL) was gauged by employing UV – vis at different time intervals.

#### **Detailed experiment procedures for the release of iodine in organic phase**

Iodine release came into being when the iodine-loaded samples (12.00 mg) were immersed in organic solvents such as ethanol (4.00 mL) at room temperature. The iodine release behavior was monitored by the UV–vis absorbance of the iodine-including ethanol within the monitored time frame.

## **Section 2. Synthesis and Characterization of TAPT, POPNs**

4,4',4''-(1,3,5-triazine-2,4,6-triyl)trianiline:

At 0 °C, a 50-ml round-bottom flask was charged with 4-aminobenzonitrile (1.55 g, 13.00 mmol) under N<sub>2</sub> atmosphere, after 20min, then 4.00 mL of trifluoromethanesulfonic acid was added dropwise via a syringe. The mixture was stirred at 0 °C for 20 min. The mixture was then warmed to room temperature and stirred for additional 24 h. The resulting mixture was diluted with distilled water (20.00 mL), then washed with NaOH aqueous solution (2 M) until the washing water exhibited pH=7. The precipitate was collected by filtration after washing with distilled water for several times and dried under vacuum to obtain the targeted product (5.9 g, 79%) <sup>1</sup>H NMR (400 MHz, DMSO-d<sub>6</sub>): 7.75-7.7(d, 6H), 6.68-6.64 (d, 6H), 5.97 (s, 6H).

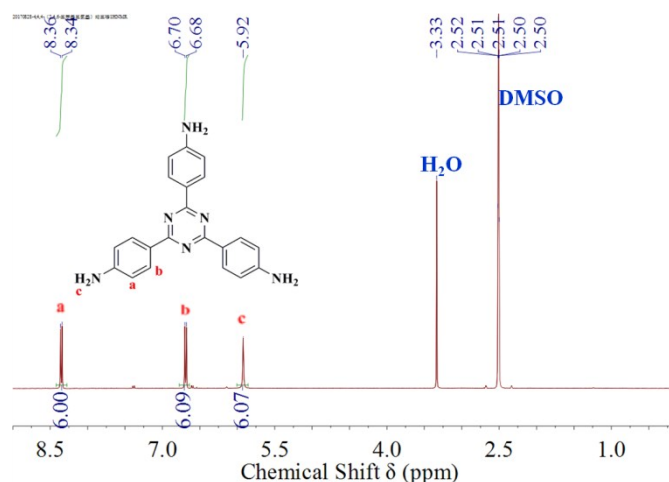

**Fig.S0**  $^1\text{H}$ NMR (400 MHz,  $\text{DMSO-d}_6$ ) spectrum of TAPT

**Preparation of MelPOP – 2.** To a solution of HCCP (700 mg, 2.00 mmol), melamine (508 mg, 4.00 mmol),  $\text{N,N}$ -dimethylformamide (7 mL) and triethylamine (5 mL) was added in a glass ampoule under  $\text{N}_2$  atmosphere. The mixture was concussed for 30 min and then degassed by three freeze-pump-thaw cycles. And then the tube was sealed under vacuum condition and warmed to room temperature. The mixture was heated up to  $125\text{ }^\circ\text{C}$  for 5 days. Cool down to room temperature, the precipitation was filtered off and successively washed with distilled water, tetrahydrofuran and dichloromethane for several times. The filter cake was soxhlet extracted with methanol, tetrahydrofuran and acetone for 24 h and dried under vacuum. The product was gained as pale white powder (MelPOP-2, yield: 90 %).

**Preparation of TatPOP – 2** TatPOP–2 was prepared employing the same procedure originating from HCCP (700 mg, 2.00 mmol) with TAPT (1.43 g, 4.00 mmol) as for MelPOP-2. Likewise, triethylamine (7 mL) and  $\text{N,N}$ -dimethylformamide (7 mL) were used as acid-binding agent and solvent. There is no obvious difference in synthesis condition and aftertreatment procedures between TatPOP-2 and MelPOP-2. The polymers were gained as khaki powder (yield: 93%).

**Fig. S1**

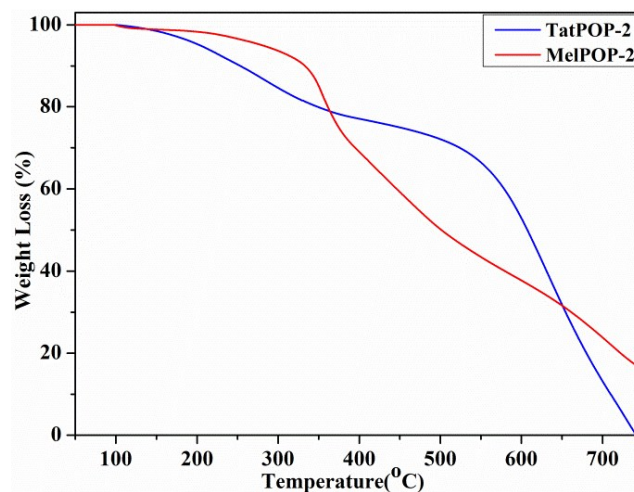

**Fig. S1** TGA curves of POPNs.

**Fig. S2**

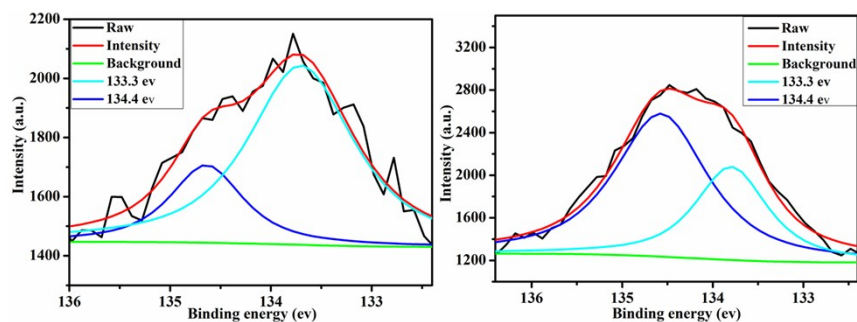

**Fig.S2** XPS spectra of P spectra for MelPOP-2 and TatPOP-2 (left to right).

**Fig. S3**

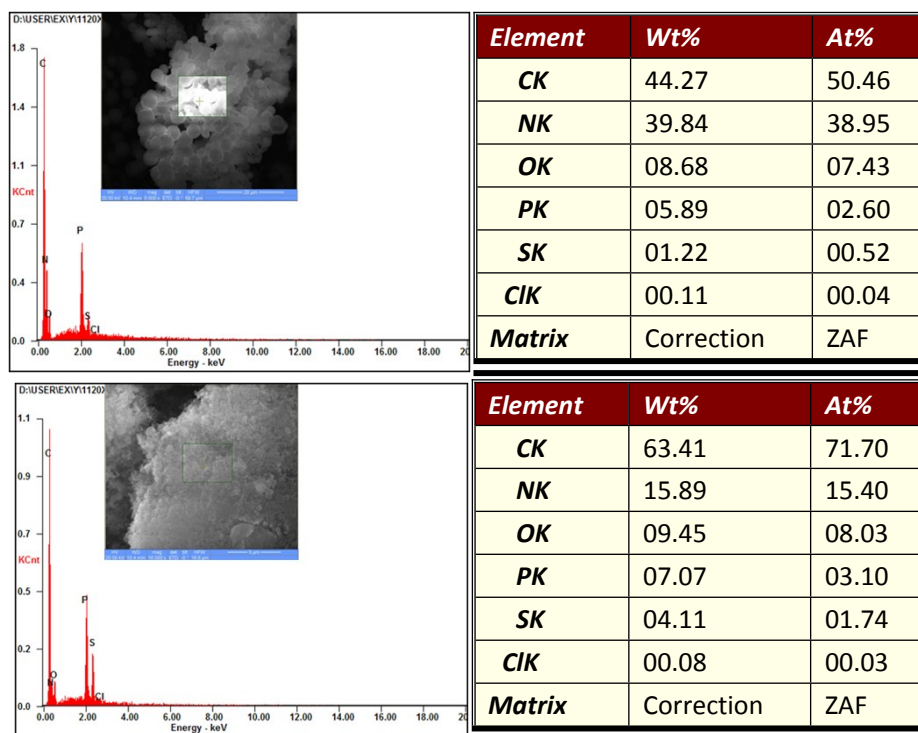

**Fig. S3** The element content data of MelPOP-2 and TatPOP-2 (from up to down) by EDS analysis.

**Fig. S4**

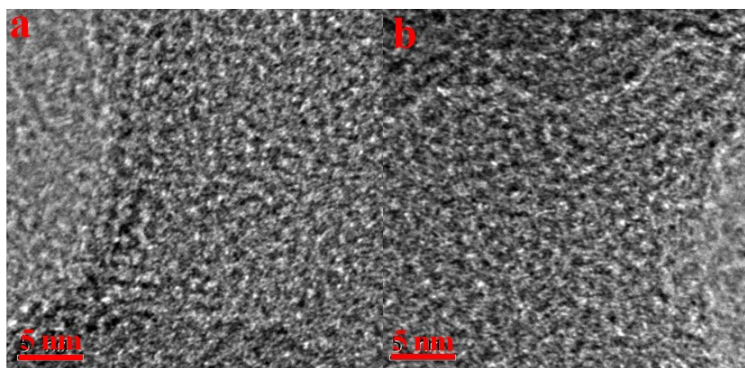

**Fig. S4** The TEM images of a) MelPOP-2, b) TatPOP-2.

Fig. S5

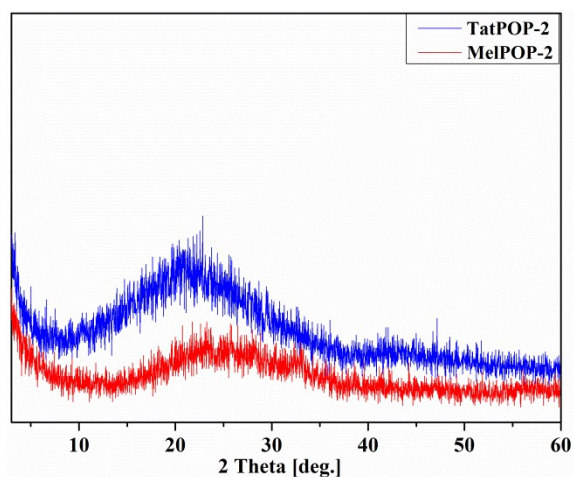

Fig. S5 Powder X-ray diffraction data for polymers

Fig. S6

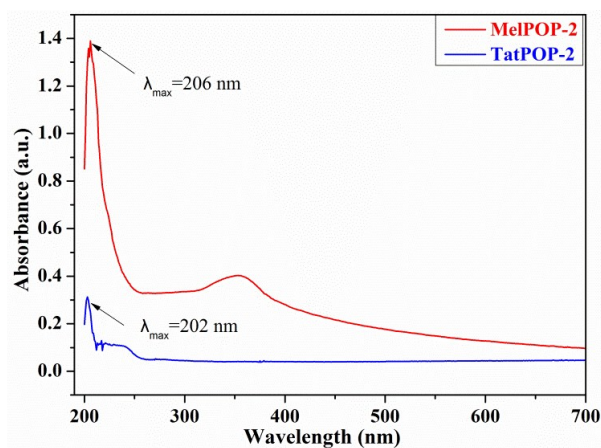

Solid UV-vis spectra of POPNs

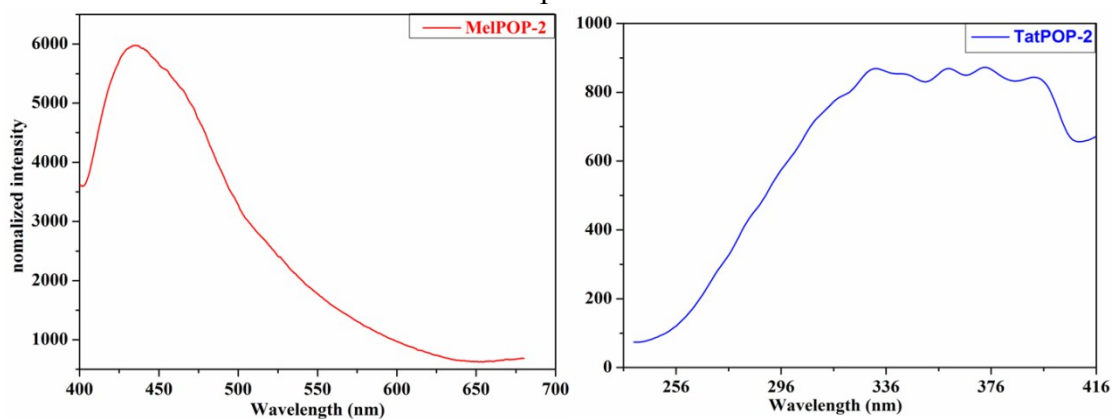

Fig. S6 Solid luminescent spectra of MelPOP-2 and TatPOP-2

Table S1 Pore parameters for polymers.

| Sample   | SA <sub>BET</sub> (m <sup>2</sup> /g) | SA <sub>LAN</sub> (m <sup>2</sup> /g) | V <sub>Total</sub> (cm <sup>3</sup> /g) |
|----------|---------------------------------------|---------------------------------------|-----------------------------------------|
| MelPOP-2 | 50.5                                  | 87.8                                  | 0.22                                    |
| TatPOP-2 | 36.5                                  | 58.5                                  | 0.18                                    |

**Fig. S7**

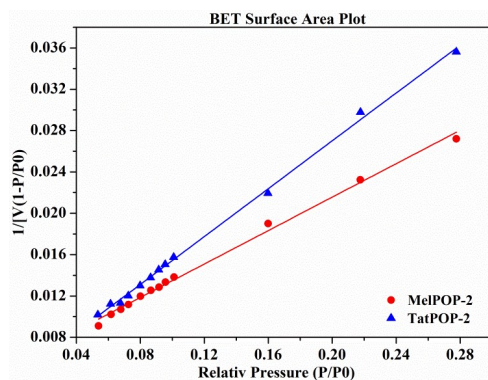

**Fig. S7** BET surface area linear plot for POPNs.

**Table S2** Summary of detailed iodine uptake properties for nanoporous organic materials.

| Absorbent  | T<br>(°C) | Pressure | $S_{\text{BET}}$<br>( $\text{m}^2/\text{g}$ ) | Ads $\text{I}_2$ per unit $S_{\text{BET}}$<br>( $\text{wt}/(\text{m}^2/\text{g})$ ) | Ads $\text{I}_2$<br>(%) | References |
|------------|-----------|----------|-----------------------------------------------|-------------------------------------------------------------------------------------|-------------------------|------------|
| TatPOP-2   | 75        | 1bar     | 50                                            | 9.00                                                                                | 450                     | This work  |
| MelPOP-2   | 75        | 1bar     | 36                                            | 7.28                                                                                | 262                     | This work  |
| BDP-CPP-1  | 75        | 1bar     | 635                                           | 0.45                                                                                | 283                     | Ref.1      |
| HCMP-3     | 85        | 1bar     | 82                                            | 4.10                                                                                | 336                     | Ref.2      |
| SCMP-2     | 77        | 1bar     | 855                                           | 0.26                                                                                | 222                     | Ref.3      |
| SIOC-COF-7 | 75        | 1bar     | 618                                           | 0.78                                                                                | 481                     | Ref.4      |
| AzoPPN     | 77        | 1bar     | 400                                           | 0.73                                                                                | 290                     | Ref.5      |
| CMPN-3     | 70        | 1 bar    | 1368                                          | 0.15                                                                                | 208                     | Ref.6      |
| PAF-24     | 75        | 1bar     | 136                                           | 2.03                                                                                | 276                     | Ref.7      |
| PAF-23     | 75        | 1bar     | 82                                            | 3.30                                                                                | 271                     | Ref.7      |
| PAF-25     | 75        | 1bar     | 262                                           | 0.99                                                                                | 260                     | Ref.7      |
| Azo-Trip   | 77        | 1 bar    | 510                                           | 0.47                                                                                | 238                     | Ref.8      |
| NiP-CMP    | 77        | 1 bar    | 2630                                          | 0.077                                                                               | 202                     | Ref.9      |
| PAF-1      | 25        | 40 Pa    | 5600                                          | 0.033                                                                               | 186                     | Ref.10     |
| NTP        | 75        | 1 bar    | 1067                                          | 0.17                                                                                | 180                     | Ref.11     |
| JUC-Z2     | 25        | 40 Pa    | 2081                                          | 0.069                                                                               | 144                     | Ref.10     |
| ZIF-8      | 75        | 1 bar    | 1875                                          | 0.064                                                                               | 120                     | Ref.12     |
| Ag@Mon-POF | 70        | 1 bar    | 690                                           | 0.036                                                                               | 25                      | Ref.13     |

### References for Table S2

1. Yunlong Zhu, Ya-Jian Ji, De-Gao Wang, Yi Zhang, Hui Tang, Xin-Ru Jia, Min Song, Guipeng Yu and Gui-Chao Kuang. BODIPY-based conjugated porous polymers for highly efficient volatile iodine capture *J. Mater. Chem. A*, 2017,**5**, 6622-6629.

2. Y. Liao, J. Weber, B. M. Mills, Z. Ren and C. F. J. Faul, Highly efficient and reversible iodine capture in hexaphenylbenzene-based conjugated microporous polymers. *Macromolecules*, 2016, 49, 6322–6333.
3. X. Qian, Z. Zhu, H. Sun, F. Ren, P. Mu, W. Liang, L. Chen and A. Li, Capture and Reversible Storage of Volatile Iodine by Novel Conjugated Microporous Polymers Containing Thiophene Units. *ACS Appl. Mater. Interfaces* 2016, 8, 21063-21069.
4. Z.-J Yin, S-Q Xu, T-G Zhan, Q-Y Qi, Z-Q Wu and X Zhao, Ultrahigh volatile iodine uptake by hollow microspheres formed from a heteropore covalent organic framework. *Chem. Commun.*, 2017, 53, 1-4.
5. H. Li, X. Ding and B.-H. Han, Porous azo-bridged porphyrin-phthalocyanine network with high iodine capture capability. *Chem. Eur. J.*, 2016, 22, 11863 – 11868.
6. Y. Chen, H. Sun, R. Yang, T. Wang, C. Pei, Z. Xiang, Z. Zhu, W. Liang, A. Li, and W. Deng, Synthesis of conjugated microporous polymer nanotubes with large surface areas as absorbents for iodine and CO<sub>2</sub> uptake. *J. Mater. Chem. A*, 2015, 3, 87-91.
7. Z. Yan, Y. Yuan, Y. Tian, D. Zhang and G. Zhu, Highly efficient enrichment of volatile iodine by charged porous aromatic frameworks with three sorption sites. *Angew. Chem. Int. Ed.*, 2015, 54, 12733–12737.
8. Q.-Q. Dang, X.-M. Wang, Y.-F. Zhan and X.-M. Zhang, An azo-linked porous triptycene network as an absorbent for CO<sub>2</sub> and iodine uptake. *Polym. Chem.*, 2016, 7, 643–647.
9. S. A, Y. Zhang, Z. Li, H. Xia, M. Xue, X. Liu and Y. Mu, Highly efficient and reversible iodine capture using a metalloporphyrin-based conjugated microporous polymer. *Chem. Commun.*, 2014, 50, 8495–8498.
10. C. Pei, T. Ben, S. Xu and S. Qiu, Ultrahigh iodine adsorption in porous organic frameworks. *J. Mater. Chem. A*, 2014, 2, 7179–7187.
11. H. Ma, J.-J. Chen, L. Tan, J.-H. Bu, Y. Zhu, B. Tan and C. Zhang, Nitrogen-rich triptycene-based porous polymer for gas storage and iodine enrichment. *ACS Macro Lett.*, 2016, 5, 1039–1043.
12. D. F. Sava, T. J. Garino and T. M. Nenoff, Iodine confinement into metal–organic frameworks (MOFs): Low-temperature sintering glasses to form novel glass composite material (GCM) alternative waste forms. *Ind. Eng. Chem. Res.*, 2012, 51, 614–620.
13. A. P. Katsoulidis, J. He and M. G. Kanatzidis, Functional monolithic polymeric organic framework aerogel as reducing and hosting media for Ag nanoparticles and application in capturing of iodine vapors. *Chem. Mater.*, 2012, 24, 1937-1943.

**Table S3** Element analysis of polymers

| Sample          | Element analysis (%) |       |      |             |       |      |
|-----------------|----------------------|-------|------|-------------|-------|------|
|                 | Found                |       |      | Anal. calcd |       |      |
|                 | N                    | C     | H    | N           | C     | H    |
| <b>MelPOP-2</b> | 44.32                | 33.63 | 6.02 | 55.13       | 18.91 | 1.59 |
| <b>TatPOP-2</b> | 15.15                | 56.41 | 6.25 | 25.08       | 60.22 | 3.61 |



**Fig. S8**

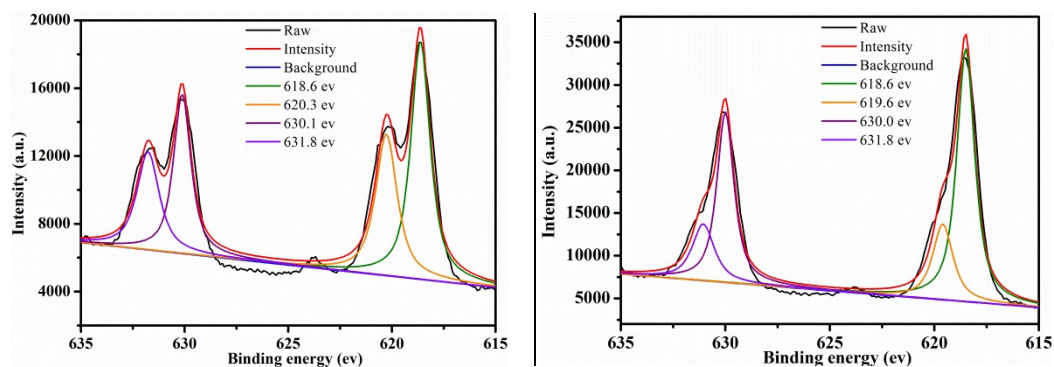

**Fig. S8** XPS spectra of TatPOP-2@I<sub>2</sub> and MelPOP-2@I<sub>2</sub> (left to right).

**Fig. S9**

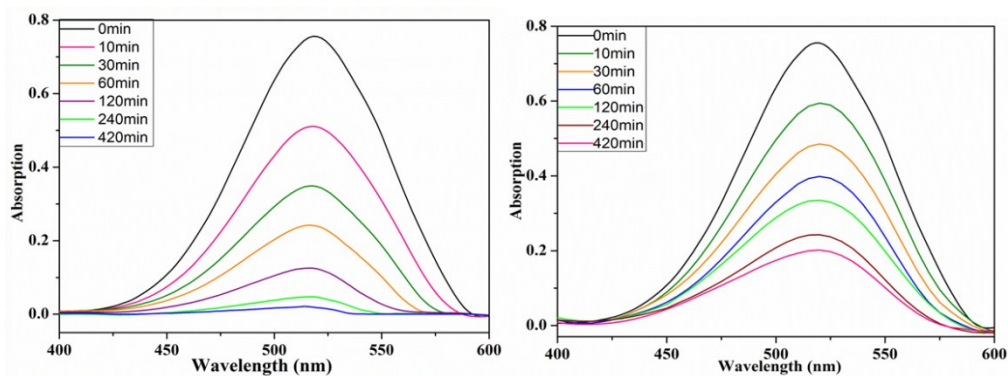

**Fig. S9** UV-vis spectra for TatPOP-2 (16 mg, left) and MelPOP-2 (16 mg, right) in iodine-hexane solution (2mL, 8 mM) at various times.

**Fig. S10**

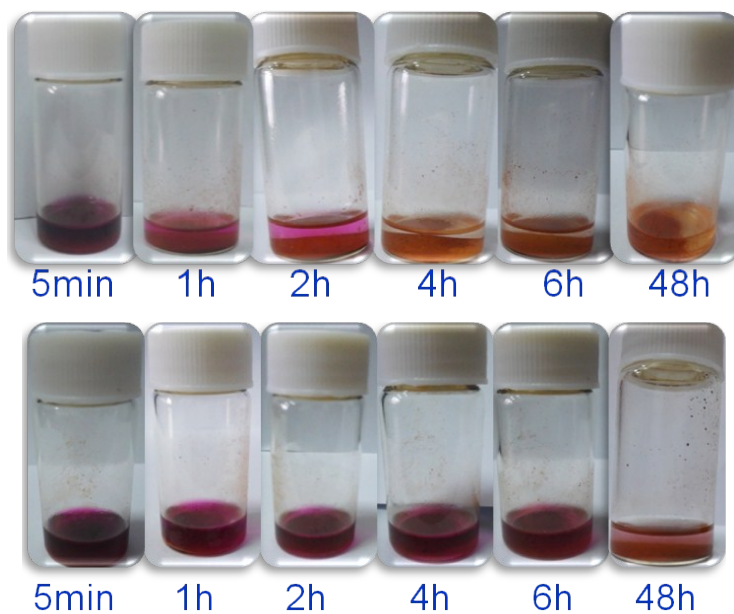

**Fig. S10** Photographs showing progress of iodine capture after TatPOP-2 and MelPOP-2 (up to bottom) (16 mg) was immersed in a hexane solution of iodine (8.0 mmol/L, 2 mL).

**Fig. S11**

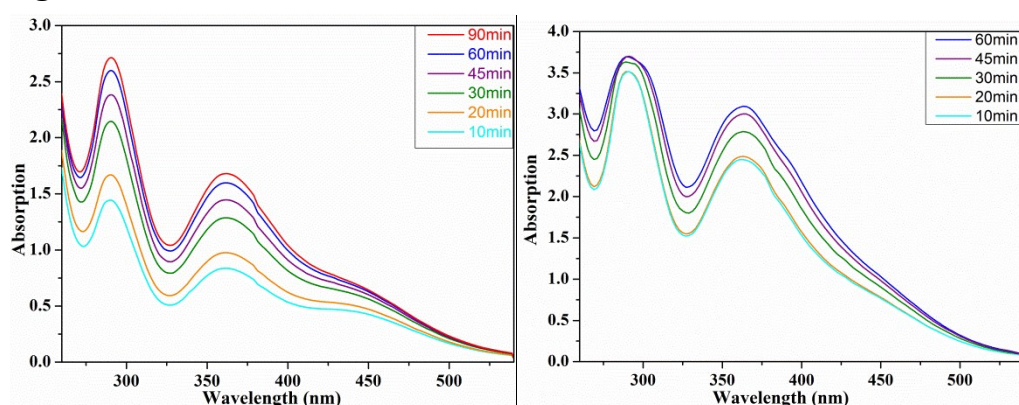

**Fig. S11** UV-*vis* spectra of iodine released from MelPOP-2@I<sub>2</sub> (left) and TatPOP-2@I<sub>2</sub> (right) (12 mg) in 4 mL anhydrous ethanol.

**Fig. S12**

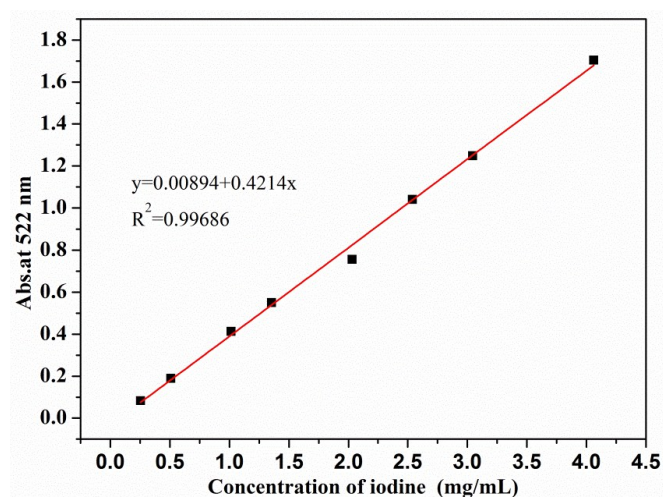

**Fig. S12** Working curve for the estimation of iodine uptake in solution.

**Fig. S13**

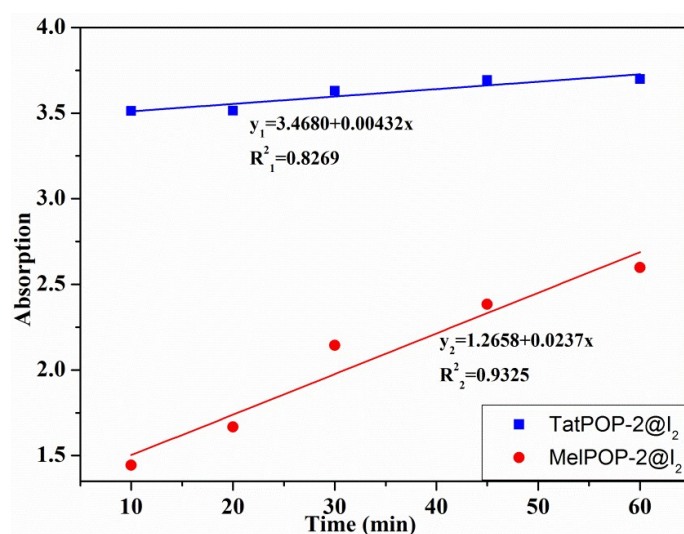

**Fig. S13** The release rate of MelPOP-2@I<sub>2</sub> and TatPOP-2@I<sub>2</sub> in ethanol.
